# Supplementary material for: A Smart Nanovector for Cancer Targeted Drug Delivery Based on Graphene Quantum Dots
Source: Nanomaterials (Basel). 2019 Feb 18;9(2):282. doi: 10.3390/nano9020282 (PMC6409783; doi:10.3390/nano9020282)
Supplement: Supplementary file 1 [file nanomaterials-09-00282-s001.pdf]

## Supporting Information to

### A smart nanovector for cancer targeted drug delivery based on graphene quantum dots

Daniela Iannazzo,<sup>a\*</sup> Alessandro Pistone,<sup>a\*</sup> Consuelo Celesti,<sup>a</sup> Claudia Triolo,<sup>b</sup> Salvatore Patanè,<sup>b</sup> Salvatore V. Giofrè,<sup>c</sup> Roberto Romeo,<sup>c</sup> Ida Ziccarelli,<sup>d</sup> Raffaella Mancuso,<sup>d</sup> Bartolo Gabriele,<sup>d</sup> Giuseppa Visalli,<sup>e</sup> Alessio Facciola<sup>e</sup> and Angela Di Pietro<sup>e</sup>

<sup>a</sup> *Department of Engineering, University of Messina, Contrada Di Dio, I-98166 Messina, Italy*

<sup>b</sup> *Department of Mathematical and Computer Sciences, Physical Sciences and Earth Sciences, Viale F. Stagno d'Alcontres, 98166 Messina, Italy*

<sup>c</sup> *Department of Chemical, Biological, Pharmaceutical and Environmental Sciences, University of Messina, Viale Annunziata, I-98168 Messina, Italy*

<sup>d</sup> *Laboratory of Industrial and Synthetic Organic Chemistry (LISOC), Department of Chemistry and Chemical Technologies, University of Calabria, Via Pietro Bucci 12/C, 87036 Arcavacata di Rende (CS), Italy*

<sup>e</sup> *Department of Biomedical and Dental Sciences and Morphological and Functional Images, University Hospital of Messina, Via Consolare Valeria, 1, 98100, Messina, Italy*

\*Corresponding authors.

E-mail addresses: diannazzo@unime.it; pistone@unime.it; Fax: +39 090 6765494; Tel: +39 090 6765569

#### Table of Contents

|                                                                                   |    |
|-----------------------------------------------------------------------------------|----|
| <b>Figure S1.</b> XRD spectra of MWCNT and GQD.....                               | S2 |
| <b>Figure S2.</b> UV–vis absorption spectrum of GQD.....                          | S2 |
| <b>Figure S3.</b> PL spectra of GQD dispersion in deionized water .....           | S3 |
| <b>Figure S4.</b> TGA of PEG-NH <sub>2</sub> and of BFG.....                      | S3 |
| <b>Figure S5.</b> <sup>1</sup> HNMR data and spectrum of Pyr-RF sample.....       | S4 |
| <b>Figure S6.</b> HRMS data and spectrum of Pyr-RF sample.....                    | S4 |
| <b>Figure S7.</b> TGA of GQD, GQD@Pyr-RF, GQD-PEG-BFG and GQD-PEG-BFG@Pyr-RF..... | S5 |

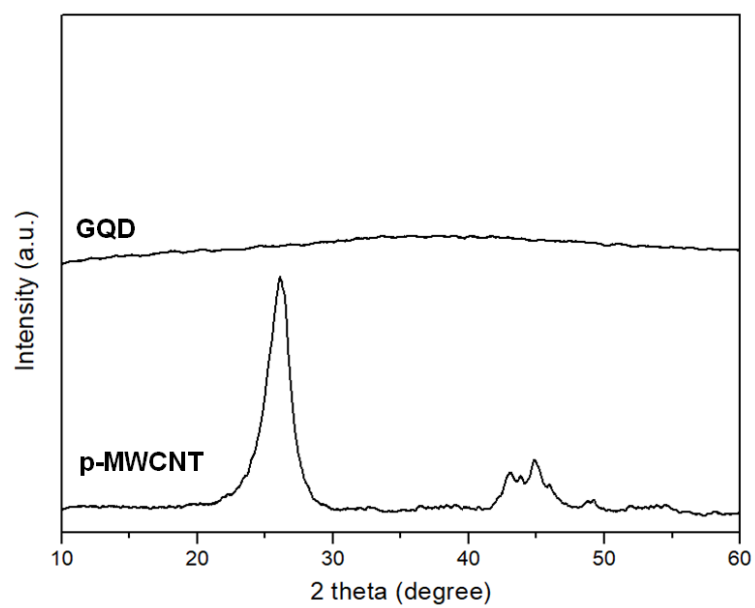

**Figure S1.** XRD spectra of GQD and of pristine MWCNT(p-MWCNT).

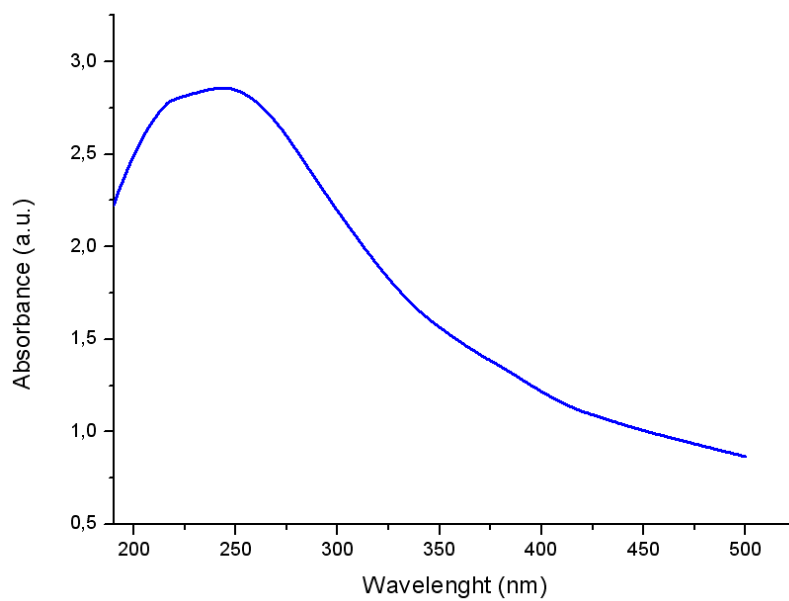

**Figure S2.** UV-vis absorption spectrum of GQD in deionized water.

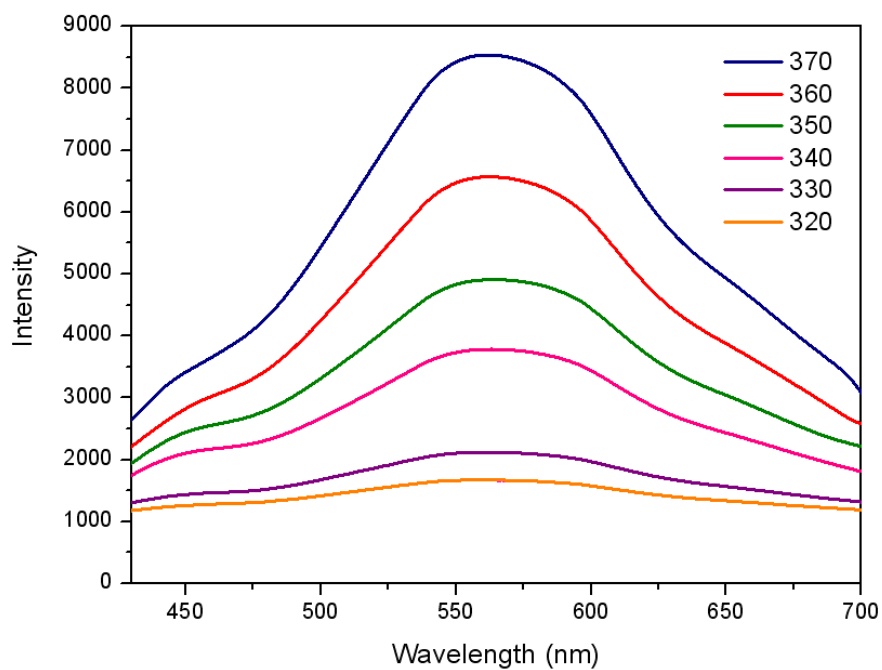

**Figure S3.** PL spectra of GQD dispersion in deionized water at the excitation wavelengths of 320, 330, 340, 350, 360 and 370 nm.

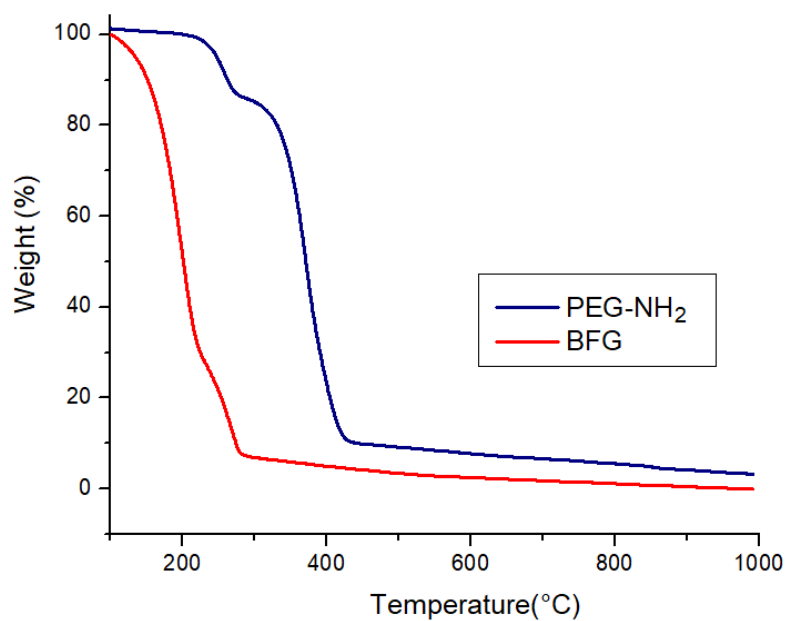

**Figure S4.** TGA curves for PEG-NH<sub>2</sub> and of BFG. All experiments were performed under argon atmosphere.

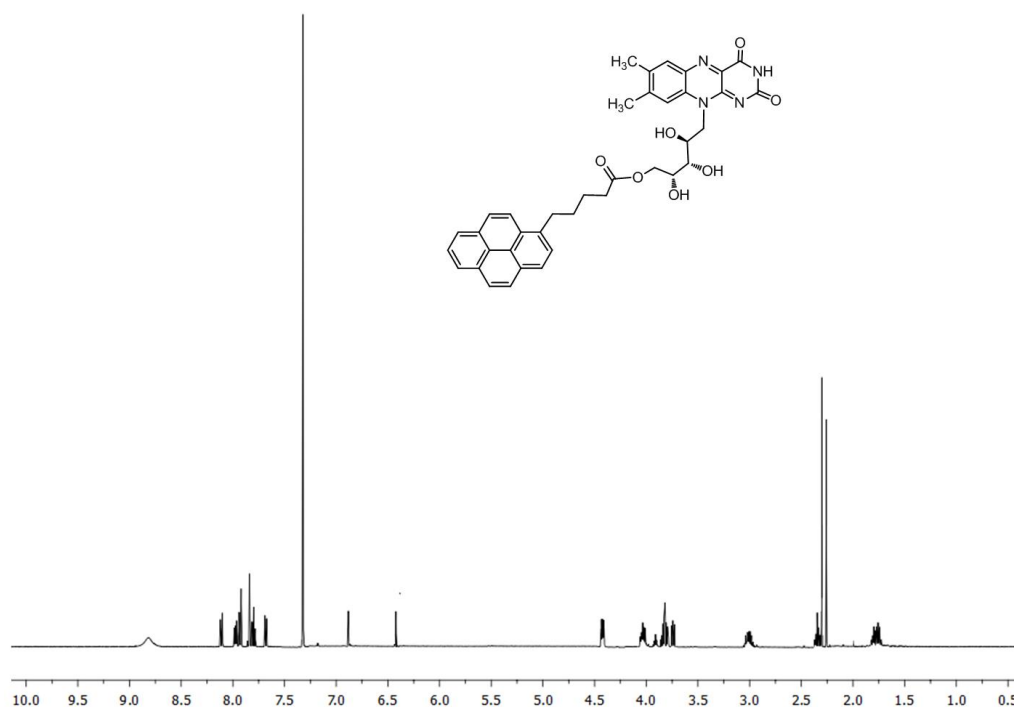

**Figure S5.** <sup>1</sup>H NMR spectrum of Pyr-RF sample. *5-(7,8-dimethyl-2,4-dioxo-3,4-dihydrobenzo[g]pteridin-10(2H)-yl)-2,3,4-trihydroxypentyl-5-(pyren-1-yl)pentanoate*. <sup>1</sup>H NMR (300 MHz, CDCl<sub>3</sub>) δ = 8.72 (br s, 1H), 8.12 (d, 1H, J = 7.4 Hz), 7.83-7.68 (m, 9H), 6.85 (s, 1H), 6.40 (s, 1H), 4.46 (dd, 1H, J = 11.92, 6.8 Hz), 4.08-3.89 (m, 2H), 3.87-3.83 (m, 1H), 3.80-3.75 (m, 3H), 3.70-3.66 (m, 2H), 3.06-2.98 (m, 2H), 2.36-2.33 (m, 5H), 2.26 (s, 3H), 1.75-1.68 (m, 4H).

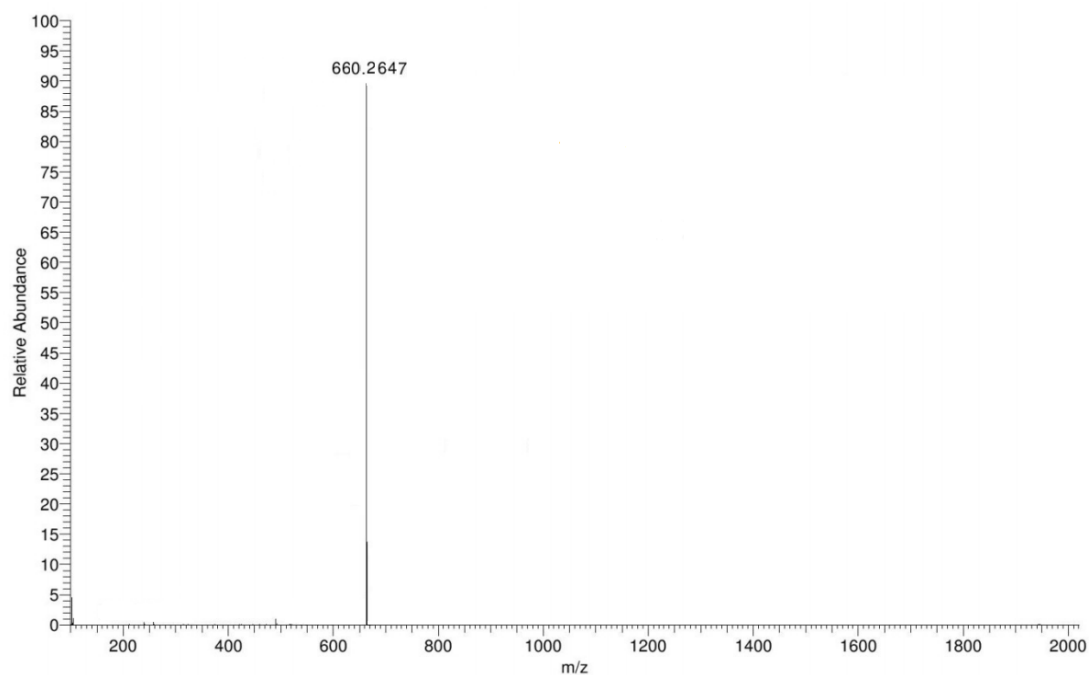

**Figure S6.** HMRS spectrum of Pyr-RF sample. HRMS (EI) for (M<sup>+</sup>) C<sub>38</sub>H<sub>36</sub>N<sub>4</sub>O<sub>7</sub>, calcd 660.2645, found 660.2647.

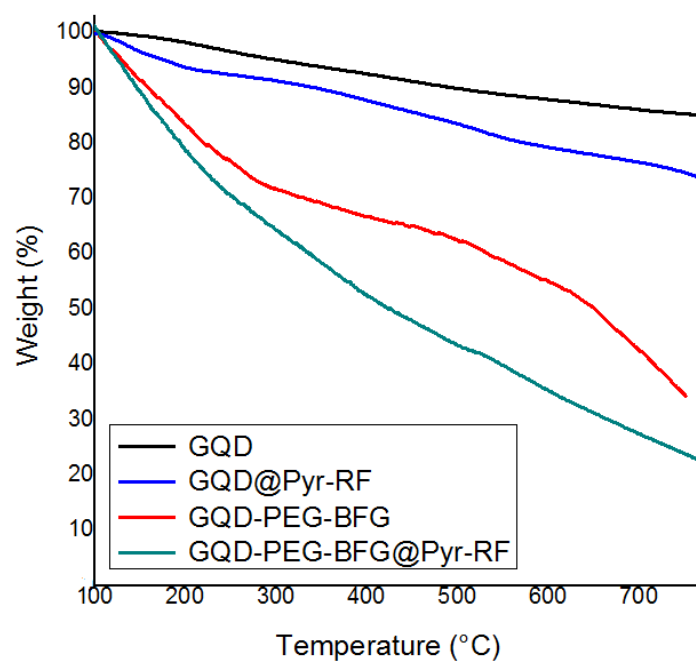

**Figure S7.** TGA curves for GQD, GQD@Pyr-RF, GQD-PEG-BFG and GQD-PEG-BFG@Pyr-RF. All experiments were performed under argon atmosphere.
